# Supplementary material
Source: PubMed Central journal article supplement (PMC5916581)

## Legends

**eFIG 1.** Trial frame used for double Maddox rod measurements. Scale is in 5° increments, but the examiner estimates the measurement to the nearest degree. In this example, the scale was read as 21° of excyclodeviation in the right and 6° of excyclodeviation in the left for a total of 27° of excyclodeviation (this particular patient was not included in the current test–retest study).

**FIG 1.** Bland–Altman plot showing 95% limits of agreement for the difference between 2 measurements of cyclodeviation using the double Maddox rod to be 4.7°. Middle dotted line represents the mean of test–retest differences (0.5°).

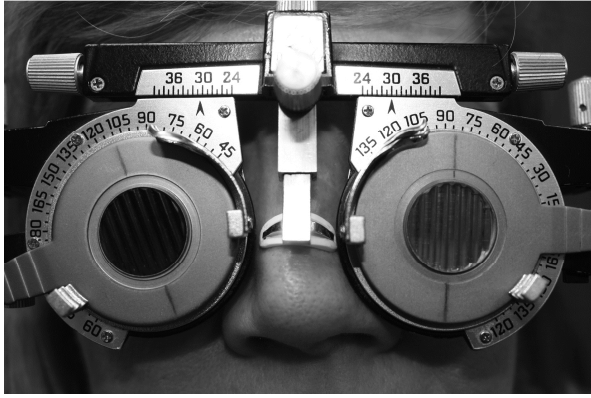

Supplement: NIHMS943876-supplement-supplement_1.pdf [file NIHMS943876-supplement-supplement_1.pdf]
